# Supplementary material for: Actionable absolute risk prediction of atherosclerotic cardiovascular disease based on the UK Biobank
Source: PubMed Central journal article supplement (PMC8836294; doi:10.1371/journal.pone.0263940), 2022-02-11
Supplement: pone.0263940.s004.pdf [file pone.0263940.s004.pdf]

**S3 Table. Specifications of the python (v3.9.6) libraries and their versions used in this study.**

| <b>Library Name</b> | <b>Version</b> |
|---------------------|----------------|
| cycler              | 0.10.0         |
| future              | 0.18.2         |
| imbalanced-learn    | 0.8.0          |
| imblearn            | 0.0            |
| joblib              | 0.16.0         |
| kiwisolver          | 1.3.1          |
| matplotlib          | 3.4.2          |
| numpy               | 1.21.1         |
| pandas              | 1.3.0          |
| Pillow              | 8.3.1          |
| pip                 | 21.1.3         |
| pyparsing           | 2.4.7          |
| python-dateutil     | 2.8.1          |
| python-dotenv       | 0.18.0         |
| pytz                | 2020.1         |
| Scikit-learn (1)    | 0.24.2         |
| scipy               | 1.7.1          |
| seaborn             | 0.11.1         |
| setuptools          | 57.0.0         |
| shap                | 0.40.0         |
| six                 | 1.15.0         |
| threadpoolctl       | 2.1.0          |
| xgboost (2,3)       | 1.4.2          |

- 1: Pedregosa F, Varoquaux G, Gramfort A, Michel V, Thirion B, Grisel O, et al. Scikit-learn: Machine Learning in Python. *Journal of Machine Learning Research*. 2011;12(85):2825–30.
2. Chen T, Guestrin C. XGBoost: A Scalable Tree Boosting System. *Proceedings of the 22nd ACM SIGKDD International Conference on Knowledge Discovery and Data Mining*. 2016 Aug 13;785–94.
3. XGBoost Documentation — xgboost 1.6.0-dev documentation [Internet]. [cited 2021 Nov 8]. Available from: <https://xgboost.readthedocs.io/en/latest/>
